# Supplementary material for: New Additions to the CRISPR Toolbox: CRISPR-CLONInG and CRISPR-CLIP for Donor Construction in Genome Editing
Source: PubMed Central journal article supplement (PMC7194329; doi:10.1089/crispr.2019.0062), 2020-04-21
Supplement: Supp_Data.pdf [file Supp_Data.pdf]

**Sequence 1.** CRISPR-*CLONInG*: Partial sequence of final FLE<sub>x</sub> vector with partial 3'UTR, FRT-PGK-Neo-FRT, tdTomato, and IRES sequences

3'UTR (gray highlight); FRT-PGK-Neo-FRT, inverted sequence (yellow highlight), tdTomato, inverted sequence (red highlight), IRES (blue highlight)

```
CNTCANAGTNGACTCNTAATAAGCTTGATATCGAATTCCGAAGTTCCTATTCTCTAGAAAGTATAGG
AACTTCAGGTCTGAAGAGGAGTTTACGTCCAGCCAAGCTAGCTTGGCTGCAGGTTCGTCGAAATTCTAC
CGGGTAGGGGAGGCGCTTTTCCCAAGGCAGTCTGGAGCATGCGCTTTAGCAGCCCCGCTGGGGCACTTG
GCGCTACACAAGTGGCCTCTGGCCTCGCACACATTCCACATCCACCGGTAGGGCGCCAACCGGCTCCGT
TCTTTGGTGGCCCCCTTCGCGCCACCTTCTACTCCTCCCCTAGTCAGGAAGTTCSCCCCCGCCCGCAGCT
CGCGTCGTGCAGGACGTGACAAATGGAAGTAGCACGTCTCACTAGTCTCGTGCAGATGGACAGCACCCG
CTGAGCAATGGAAGCGGGTAGGCCTTTGGGGCAGCGGCCAATAGCAGCTTTGCTCCTTCGCTTTCTGG
GCTCAGAGGCTGGGAAGGGGTGGGTCCGGGGGCGGGGCTCAGGGGCGGGGCTCAGGGGCGGGGCGGGCG
CCCGAAGGTCCTCCGGAGGCCCCGGCATTCTGCACGCTTCAAAGCGCACGTCTGCCGCGCTGTTCTCCT
CTTCTCATCTCCGGGCCTTTGACCTGCAGCCTGTTGACAATTAATCATCGGCATAGTATATCGGCAT
AGTATAATACGACAAGGTGAGGAACTAAACCATGGGATCGGCCATTGAACAAGATGGATTGCACGCA
GGTTCTCCGGCCGCTTGGGTGGAGAGGCTATTCGGCTATGACTGGGCACAACAGACAATCGGCTGCTC
TGATGCCGCCGTGTTCCGGCTGTCAGCGCAGGGGCGCCCGTCTTTTTGTCAAGACCGACCTGTCCGG
TGCCCTGAATGAACTGCAGGACGAGGCAGCGCGGCTATCGTGGCTGGCCACGACGGGCGTTCCTTGCG
CAGCTGTGCTCGACGTTGTCACTGAAGCGGGAAGGGACTGGCTGCTATTGGGCGAAGTGCCGGGGCAG
GATCTCCTGTCATCTCACCTTGCTCCTGCCGAGAAAGTATCCATCATGGCTGATGCAATGCGGCGGCTG
CATACTGTTGATCCGGCTACCTGCCATTGACCACCAAGCGAAACATCGCATCGAGCGAGCACGTAC
TCGGATGGAAGCCGGTCTTGTCGATCAGGATGATCTGGACGAAGAGCATCAGGGGCTCGCGCCAGCCG
AACTGTTCCGCAAGGCTCAAGGCGCGCATGCCCGACGGCGATGATCTCGTTCGTGACCCATGGCGATGCC
TGCTTGCCGAATATCATGGTGGAAAATGGCCGCTTTTCTGGATTTCATCGACTGTGGCCGGCTGGGTGTG
GCGGACCGCTATCAGGACATAGCGTTGGCTACCCGTGATATTGCTGAAGAGCTTGGCGGCGAATGGGC
TGACCGCTTCTCGTGCTTTACGGTATCGCCGCTCCCGATTTCGACGCGCATCGCCTTCTATCGCCTTCTT
GACGAGTTCTTCTGAGGGGATCAATTCTCTAGAGCTCGCTGATCAGCCTCGACTGTGCCTTCTAGTTGC
CAGCCATCTGTTGTTGCCCTCCCCCGTGCCTTCTTGACCCTGGAAGGTGCCACTCCCCTGTCCCTTT
CCTAATAAAAATGAGGAAATTGCATCGCATTGTCTGAGTAGGTGTATTCTATTCTGGGGGGTGGGGT
GGGACAGGACAGCAAGGGGGAGGATTGGGAAGACAATAGCAGGCATGCTGGGGATGCGGTGGGCTCT
ATGGCTTCTGAGGCGAAAGAACCAGCTGGGGCTCGACTAGAGCTTGGCGGAACCCCTTCGAAGTTCCTA
TTCTCTAGAAAGTATAGGAACTTCATCAGTCAGGTACATAATATCTACTTGTACAGCTCGTCCATGCCG
TACAGGAACAGGTGGTGGCGGCCCTCGGAGCGCTCGTACTGTTCCACGATGGTGTAGTCCCTCGTTGTG
GGAGGTGATGTCCAGCTTGGTGTCCACGTAGTAGTAGCCGGGCAGTTGCACGGGCTTCTTGGCCATGT
AGATGGTCTTGAACCTCACCAGGTAGTGGCCGCGTCTTCAGCTTCAGGGCCTGGTGGATCTCGCCCT
TCAGCACGCCGTCGCGGGGGTACAGGCGCTCGGTGGAGGCCTCCCAGCCCATGGTCTTCTTCTGCATT
ACGGGGCCGTCGGGGGGGAAGTTGGTGCCGCGCATCTTACCTTGTAGATCAGCGTGCCGTCCTGCAG
GGAGGAGTCTGGGTACGGTCACCAGACCGCCGTCCTCGAAGTTCATCACGCGCTCCCCTTGAAGC
CCTCGGGGAAGGACAGCTTCTTGTAAATCGGGGATGTCGGCGGGGTGCTTACGTACGCCTTGGAGCCG
TACATGAACTGGGGGGACAGGATGTCCAGGCGAAGGGCAGGGGGCCGCCCTTGGTACCTTCAGCTT
GGCGGTCTGGGTGCCCTCGTAGGGGCGGCCCTCGCCCTCGCCCTCGATCTCGAACTCGTGGCCGTTTAT
GGAGCCCTCCATGCGCACCTTGAAGCGCATGAACTCTTGTATGACGGCCATGTTGTTGTCCTCGGAGGA
GGCGGTGCCGGAGCTGCCGCTGCCGGTGTGTCGGGTGCCATGCCCCAGGAACAGGTGGTGGCGGCCCT
CGGAGCGCTCGTACTGTTCCACGATGGTGTAGTCTCGTTGTGGGAGGTGATGTCCAGCTTGGTGTCCA
CGTAGTAGTAGCCGGGCAGTTGCACGGGCTTCTTGGCCATGTAGATGGTCTTGAACCTCACCAGGTAG
TGGCCGCGTCTTTCAGCTTCAGGGCCTGGTGGATCTCGCCCTTCAGCACGCCGTCGCGGGGGTACAG
GCGCTCGGTGGAGGCCTCCCAGCCCATGGTCTTCTTCTGCATTACGGGGCCGTCGGGGGGGAAGTTGG
TGCCGCGCATCTTACCTTGTAGATCAGCGTGCCGTCCTGCAGGGAGGAGTCTGGGTACGGTACCA
GACCGCCGTCCTCGAAGTTCATCACGCGCTCCCCTTGAAGCCCTCGGGGAAGGACAGCTTCTTGTAAAT
CGGGGATGTCGGCGGGGTGCTTACGTACGCCTTGGAGCCGTACATGAACTGGGGGGACAGGATGTCC
CAGGCGAAGGGCAGGGGGCCGCCCTTGGTACCTTCAGCTTGGCGGTCTGGGTGCCCTCGTAGGGGCG
```

GCCCTCGCCCTCGCCCTCGATCTCGAACTCGTGGCCGTTTCATGGAGCCCTCCATGCGCACCTTGAAGCG  
CATGAACTCTTTGATGACCTCCTCGCCCTTGCTCACCATGGT TGTGGCCATATTATCATCGTGTTTTTCA  
AAGGAAAACCACGTCCCCGTGGTTCGGGGGGCCTAGACGTTTTTTTAACTCGACTAAACACATGTAA  
AGCATGTGCACCGAGGCCCCAGATCAGATCCCATACAATGGGGTACCTTCTGGGCATCCTTCAGCCCC  
TTGTTGAATACGCTTGAGGAGAGCCATTTGACTCTTTCCACAACCTATCCAACCTCACAACGTGGCACTGG  
GGTTGTGCCGCCTTTGCAGGTGTATCTTATACACGTGGCTTTTGGCCGCAGAGGCACCTGTCGCCAGGT  
GGGGGGTTCCGCTGCCTGCAAAGGGTCGCTACAGACGTTGTTTGTCTTCAAGAAGCTTCCAGAGGAAC  
TGCTTCTTACGACATTCAACAGACCTTGCATTCTTTGGCGAGAGGGGAAAGACCCCTAGGAATGC  
TCGTCAAGAAGACAGGGCCAGGTTTCCGGGCCCTCACATTGCCAAAAGACGGCAATATGGTGGAAAAT  
AACATATAGACAAACGCACACCGGCCTTATTCCAAGCGGCTTCGGCCAGTAACGTTAGGGGGGGGGGA  
GGGAGAGGGG

**Sequence 2.** CRISPR-*CLONInG*: Partial FLEx vector sequence showing CRISPR-Cas9 allows precise excision of Luciferase gene from its adjacent 3'UTR and IRES sequences, with only 1 nt deviation

3'UTR (gray highlight), luciferase gene, inverted sequence (green highlight), IRES (blue highlight), PAM NGG (bold), CRISPR target site (underlined), slash (Cas9 cleavage site), gRNA Luc-A (red); partial sequence changed to maintain research confidentiality; gRNA Luc-B (violet)

CNTCANAGTNGACTCNT/ACACGGCGATCTTGCCGCCCTTCTTGGCCTTAATGAGAATCTCGCGGATC  
TTGCGGGCGTCCAACCTTGCCGGTCAGTCCTTTAGGCACCTCGTCCACGAACACAACACCACCGCGCAG  
CTTCTTGGCGGTTGTAACCTGGCTGGCCACATAGTCCACGATCTCCTTCTCGGTCATGGTTTTACCGTGT  
TCCAGCACGACGACTGCGGCGGGCAGCTCGCCGGCATCGTCTCGGGCAGGCCGGCGACCCCGGCGTC  
GAAGATGTTGGGGTGTGTCAGCAGGATGCTCTCCAGTTCGGCTGGGGCTACCTGGTAGCCCTTGATTT  
GATCAGGCTCTTACGCCGGTCCACGATGAAGAAGTGCTCGTCTCGTCCAGTAGGCGATGTCGCCGCT  
GTGCAGCCAGCCGTCCTTGTGATGAGAGCGTTTGTAGCCTCGGGGTTGTTAACGTAGCCGCTCATGAT  
CATGGGGCCACGGACGCACAGCTCGCCGCGCTGGTTCACACCCAGTGTCTTACCGGTGTCCAAGTCCA  
CCACCTTAGCCTCGAAGAAGGGCACCACCTTGCCTACTGCGCCAGGCTTGTGCTCCCTTCGGGGGTGA  
TCAGAATGGCGCTGGTTGTTTCTGTCAGGCCGTAGCCCTGGCGGATGCCTGGTAGGTGGAAGCGTTTGG  
CCACGGCCTCACCTACCTCCTTGTGATGAGCGGCCCCCGCCGCTGGCGATCTCGTGC AAGTTGCTTAGGT  
CGTACTTGTGATGAGAGTGCTCTTAGCGAAGAAGCTAAATAGTGTGGCACCAGCAGGGCAGATTGA  
ATCTTATAGTCTTGCAAGCTGCGCAAGAATAGCTCCTCCTCGAAGCGGTACATGAGCACGACCCGAAA  
GCCGCAGATCAAGTAGCCAGCGTGGTGAACATGCCGAAGCCGTGGTGAATGGCACCAGCTGAGG  
ATAGCGGTGTCGGGGATGATCTGGTTGCCGAAGATGGGGTCGCGGGCATGACTGAATCGGACACAAGC  
GGTGCAGGTGCGGTAGGGCTACGCCCTTGGGCAATCCGGTACTGCCACTACTGTTTCATGATCAGGGCGA  
TGGTTTTGTCCGGTCAAGCTCTCGGGCACGAAGTCGTA CTGTTGAAGCCGGGTGGCAATGGGAA  
GTCACGAAGGTGTACATGCTTTGGAAGCCCTGGTAGTCCGCTTGTCTATCCATGATGATGATCTTTTGT  
ATGATCGGTAGCTTCTTTGACGTTGAGGATCTTTTGCAGCCCTTCTTGTCTACGAATACGACGGTG  
GGCTGGCTGATGCCATGCTGTTTACGAGCTCGCGCTCGTTGTAGATGTCGTTAGCTGGGGCCACAGCC  
ACACCGATGAACAGGGCACCCAACACGGGCATGAAGAAGTGAAGCTATTCTCGCTGCACACCACGAT  
CCGATGGTTTTGATTCAGCCCATAGCGCTTCATAGCTTCTGCCAGCCGAACGCTCATCTCGAAGTACTC  
GGCGTAGGTAATGTCCACCTCGATATGTGCGTCGGTAAAGGCGATGGTGCCGGGCACCAGGGCGTAGC  
GTTTCATGGCTTTGTGACGCTGCTCGCCGGCGGTCCCGTCTTCGAGTGGGTAGAATGGCGCTGGGCCCT  
TCTTAATGTTTTTGGCATCTTCCATGG/TGTGGCCATATTATCATCGTGTTTTTCAAAGGAAAACCACG  
TCCCCGTGGTTCGGGGGGCCTAGACGTTTTTTTAACTCGACTAAACACATGTAAAGCATGTGCACCGA  
GGCCCCAGATCAGATCCCATACAATGGGGTACCTTCTGGGCATCCTTCAGCCCCCTGTTGAATACGCTT  
GAGGAGAGCCATTTGACTCTTTCCACAACCTATCCAACCTCACAACGTGGCACTGGGGTTGTGCCGCCTT  
GCAGGTGTATCTTATACACGTGGCTTTTGGCCGCAGAGGCACCTGTCGCCAGGTGGGGGGTTCCGCTGC  
CTGCAAAGGGTCGCTACAGACGTTGTTTGTCTTCAAGAAGCTTCCAGAGGAAGTCTTCTTACGACA  
TTCAACAGACCTTGCATTCTTTGGCGAGAGGGGAAAGACCCCTAGGAATGCTCGTCAAGAAGACAGG  
GCCAGGTTTCCGGGCCCTCACATTGCCAAAAGACGGCAATATGGTGGAAAATAACATATAGACAAACG  
CACACCGGCCTTATTCCAAGCGGCTTCGGCCAGTAACGTTAGGGGGGGGGGAGGGAGAGGGG

**Sequence 3.** CRISPR-*CLONInG*: Sequence of assembled custom AAV-v2, comprising sgRNA-W, sgRNA-X, and mutant exon10 of Psen1.

ITR (gray highlight), U6 promoter (green highlight), spacer sequence for W and X (yellow highlight), Tracr RNA (underlined), HA (italics), three amino acid replaced (red, green, and blue)

```
CCTGCAGGCAGCTGCGGCTCGCTCGCTCACTGAGGCCGCCCGGGCAAAGCCCCGGGCGTCGGGCGA
CCTTTGGTCGCCCCGGCCTCAGTGAGCGAGCGAGCGCGCAGAGAGGGAGTGGCCAACTCCATCACTAGG
GGTTCCTGCGGCCGCACGCGTGAGGGCCTATTTCCCATGATTCCTTCATATTTGCATATACGATACAAG
GCTGTTAGAGAGATAATTGGAATTAATTTGACTGTAAACACAAAGATATTAGTACAAAATACGTGACC
TAGAAAGTAATAATTTCTTGGGTAGTTTGCAGTTTAAAAATTATGTTTTAAAAATGGACTATCATATGCT
TACCGTAACTTGAAAGTATTTTCGATTTCTTGGCTTTATATATCTTGTGGAAAGGACGAAACACCGTCTA
ACGAGTGAAGACCCGGTTTTTAGAGCTAGAAATAGCAAGTAAAATAAGGCTAGTCCGTTATCAACTT
GAAAAAGTGGCACCGAGTCGGTGCTTTTTTCTAGAAGAGGGCCTATTTCCCATGATTCCTTCATATT
GCATATACGATACAAGGCTGTTAGAGAGATAATTGGAATTAATTTGACTGTAAACACAAAGATATTAG
TACAAAATACGTGACGTAGAAAGTAATAATTTCTTGGGTAGTTTGCAGTTTAAAAATTATGTTTTAAAA
TGGACTATCATATGCTTACCGTAACTTGAAAGTATTTTCGATTTCTTGGCTTTATATATCTTGTGGAAAG
GACGAAACACCGCATTCTAACGAGTGAAGACCTTTTAGAGCTAGAAATAGCAAGTAAAATAAGGC
TAGTCCGTTATCAACTTGAAAAAGTGGCACCGAGTCGGTGCTTTTTTGTTTAGAGCTAGAAATAGCAA
GTTAAAATAAGGCTAGTCCGTAGCGGTGCGCCAATTCTGCAGACAAATTCTAGAGGTACCCGTTACA
TAACTTACGGTAAATGGCCCCGCTGGCTGACCGCCCAACGACCCCGCCATTGACGTCAATAATGAC
GTATGTTCCCATAGTAACGCCAATAGGGACTTTCCATTGACGTCAATGGGTGGAGTATTTACGGTAAAC
TGCCCACTTGGCAGTACATCAAGTGTATCATATGCCAAGTACGCCCCCTATTGACGTCAATGACGGTAA
ATGGCCCCGCTGGCATTATGCCAGTACATGACCTTATGGGACTTTCTACTTGGCAGTACATCTACGT
ATTAGTCATCGCTATTACCATGGGACAGTCAAGTGTGCTGGGCATAGCCAGACCCGCATGCAGGGAACATGG
AAGCCATTTCTTCTTCTTAAAAAGAGGAAATAAAGGAGAAAATGTCAGCCCTCTAGACATTGCCACATCAT
AGTTCCTCCACTGGAGAACTTACATGGAGAAAAGGAATTCCTGTGCTTGCCTTAACTGATACTCCGCCCTCTG
GAACGTGGCGGCGATGGTCTAAGGATTAAGTGTCTGATTAACCTTCTCTCTTAAAGGAGCGGAGAGAGAGA
CACAGGACAGTGGTTCTGGGAACGATGATGGTGGCTTCAGTGAGGAGTGGGAGGCCCAAAGAGACAGTCAC
CTGGGGCCTCATCGCTCCACTCCCGAGTCAAGAGCTGCTGTCCAGGAACTTTCTGGGGCTATTCTAGCAGGT
GAAGACCCGGAGGAAAGTACGTGCATCACCTCTGCCTGACATCACGGCGGTGACATCACGGCGGTCTGTCA
GTGGCAGGGTATCTGTCTTTCAGAGGATGTTGAGTTTTCTGGGGAAATAGCTTATTAGGTGTTTGCCACAC
AAACATAAGAGGCTGAGTTAATCTCCAGCACTGTGTGTGTGTGTGTGTGTGTGTGTGTGTGTGTGTGTGA
GTGTGTGTGTGTGTGTGTGTGTGTGTGTGTGTGTGTGTGTGTGTGTGTGTGTGTGTGTGTGTGTGTGTGA
GCAGGTATAGACAGGACGACCTCTGGGGCTTGTGACCAGCCGCTCTAACTGAACCAATTCCAGTTCCGTGTG
CTATGCCAGCTCCAAAATAAGCTAGAGAATGATTCAAGAAGACACCAGGCTGTAGGTAACCACGTGCGGA
CCGAGCGGCCGCAGGAACCCCTAGTGATGGAGTTGGCCACTCCCTCTCTGCGCGCTCGCTCGCTCACT
GAGGCCGGGCGACCAAAGGTGCGCCGACGCCCGGGCTTTGCCCGGGCGGCCTCAGTGAGCGAGCGAG
CGCGCAGCTGCCTGCAGGGCGCCTGATGCGGTATTTCTCCTTACGCATCTGTGCGGTATTTACACACC
GCATACGTCAAAGCAACCATAGTACGCGCCCTGTAGCGGCGCATTAAAGCGCGGCGGGTGTGGTGGTTA
CGCGCAGCGTGACCGCTACACTTGCCAGCGCCCTAGCGCCCGCTCCTTTTCGCTTTCTTCCCTTCTTTCT
CGCCACGTTCCCGGCTTTCCCCGTCAAGCTCTAAATCGGGGGCTCCCTTTAGGGTTCGGATTTAGTGC
TTTACGGCACCTCGACCCCAAAAACCTTGATTTGGGTGATGGTTCACGTAGTGGGCCATCGCCCTGATA
GACGGTTTTTCGCCCTTTGACGTTGGAGTCCACGTTCTTTAATAGTGGACTCTTGTTCCAAACCTGGAAC
AACACTCAACCCTATCTCGGGCTATTCTTTTATTATAAAGGATTTTGCCGATTTTCGGCCTATTGGTTA
AAAAATGAGCTGATTTAACAAAAATTTAACGCGAATTTTAAACAAAATATTAACGTTTACAATTTTATGG
TGCATCTCAGTACAATCTGCTCTGATGCCGCATAGTTAAGCCAGCCCCGACACCCGCCAACACCCCGCT
GACGCGCCCTGACGGCTTGTCTGCTCCCGCATCCGCTTACAGACAAGCTGTGACCGTCTCCGGGAG
CTGCATGTGTCAGAGGTTTTACCCGTCATACCCGAAACGCGCGAGACGAAAGGGCCTCGTGATACGCC
TATTTTTATAGGTTAATGTCATGATAATAATGGTTTTCTTAGACGTCAGGTGGCACTTTTCGGGGAAATG
TGCGCGGAACCCCTATTTGTTTATTTTTCTAAATACATTCAAATATGTATCCGCTCATGAGACAATAAC
CCTGATAAATGCTTCAATAATATTGAAAAAGGAAGAGTATGAGTATTCAACATTTCCGTGTCGCCCTTA
```

TTCCTTTTTTGCGGCATTTCCTGTTTTTGTCTACCCAGAAACGCTGGTGAAAGTAAAAGATGC  
TGAAGATCAGTTGGGTGCACGAGTGGGTTACATCGAACTGGATCTCAACAGCGGTAAGATCCTTGAGA  
GTTTTCGCCCCGAAGAAGTTTTCCAATGATGAGCACTTTTAAAGTTCTGCTATGTGGCGCGGTATTAT  
CCCGTATTGACGCCGGGCAAGAGCAACTCGGTGCGCCGATACACTATTCTCAGAATGACTTGGTTGAG  
TACTCACCAGTCACAGAAAAGCATCTTACGGATGGCATGACAGTAAGAGAATTATGCAGTGCTGCCAT  
AACCATGAGTGATAAACTGCGGCCAACTTACTTCTGACAACGATCGGAGGACCGAAGGAGCTAACCG  
CTTTTTTGCACAACATGGGGGATCATGTAACCTCGCCTTGATCGTTGGGAACCGGAGCTGAATGAAGCC  
ATACCAAACGACGAGCGTGACACCACGATGCCTGTAGCAATGGCAACAACGTTGCGCAAACCTATTAAC  
TGCGGAACTACTTACTCTAGCTTCCCGGCAACAATTAATAGACTGGATGGAGGCGGATAAAGTTGCAG  
GACCACTTCTGCGCTCGGCCCTCCGGCTGGCTGGTTTATTGCTGATAAATCTGGAGCCGGTGAGCGTG  
GGTCTCGCGGTATCATTGCAGCACTGGGGCCAGATGGTAAGCCCTCCCGTATCGTAGTTATCTACACGA  
CGGGGAGTCAGGCAACTATGGATGAACGAAATAGACAGATCGCTGAGATAGGTGCCTCACTGATTAAG  
CATTGGTAACTGTCAGACCAAGTTTACTCATATATACTTTAGATTGATTTAAAACCTCATTTTTTAATTA  
AAAGGATCTAGGTGAAGATCCTTTTTGATAATCTCATGACCAAAATCCCTAACGTGAGTTTTCGTTCC  
ACTGAGCGTCAGACCCCGTAGAAAAGATCAAAGGATCTTCTTGAGATCCTTTTTTCTGCGCGTAATCT  
GCTGCTTGCAAAACAAAAACCACCGCTACCAGCGGTGGTTTGTGTTGCCGGATCAAGAGCTACCAACT  
CTTTTTCCGAAGGTAACCTGGCTTACGACAGAGCGCAGATACCAAACTGTCCTTCTAGTGATAGCCGTAG  
TTAGGCCACCACTTCAAGAACTCTGTAGCACCCGCTACATACCTCGCTCTGCTAATCCTGTTACCAGTG  
GCTGCTGCCAGTGGCGATAAGTTCGTGTCTTACCGGGTTGGACTCAAGACGATAGTTACCGGATAAGGC  
GCAGCGGTGCGGGTGAACGGGGGGTTCGTGCACACAGCCAGCTTGGAGCGAACGACCTACACCGAA  
CTGAGATACCTACAGCGTGAGCTATGAGAAAGCGCCACGCTTCCCGAAGGGAGAAAGGCGGACAGGT  
ATCCGGTAAGCGGCAGGGTCGGAACAGGAGAGCGCACGAGGGAGCTTCCAGGGGAAACGCCTGGTA  
TCTTTATAGTCTGTGCGGTTTCGCCACCTTGACTTGAGCGTGCATTTTTGTGATGCTCGTCAGGGGG  
GCGGAGCCTATGGAAAACGCCAGCAACGCGGCCTTTTTACGGTTCCTGGCCTTTTGCTGGCCTTTTGC  
TCACATGT

**Sequence 4.** CRISPR-*CLIP*: Sequence of IssDNA donor source template (dsDNA) for Psen1-CKI allele.

EcoRV (gray highlight), Lox66 (green highlight), Exon 10 (yellow highlight), Exon 10 with three amino acid KI (blue highlight), Lox71 (pink highlight), three amino acid replaced—inverted orientation (red, green, and blue), Cas9n site (underlined; PAM bolded)

**GATATC**ACGAGAGTCTCCTAGAGAAACAGGCTCTCCCTAGTAAGTACACGTAGGACTATTCACGGA  
GCTGAAATCCCCCCCCCACACACACACACTGTGAGTTCAAGACTAACCTGACTGTGTGGGGA  
GATCTTGTACAGAAAGGGGTGGGAGTGCAAGGGTCTCTTGCCAGTATGTCCAGAATAACTGAAAA  
CATTAGGTGGGAGTGCAGTCAAGGTTACACTAGGCGCGCCAGTAGTATTTAGTGGCCTGGGTAATG  
GTGACAACCAAGGACTGTGATACTGCAGAAGGCACTAAAGAAAACATCAGAAGCTCTGTGAGAAAG  
AAGTGAAGAACAGGGTGGTGTAAACTGAAGCAGAAAGGAGCTTTCTTAAAAAGACAAACCTTAGA  
AAGTTGAAAAAGAAAAGTAAGATGTTAGGCCTAATTAAGGCTATAGGCCTAATTTAAAGTAAAATAA  
ATTTTATCTTATATGCATACATATGTGTATTTATATTTATGTGTTTGAGTGTGGCCTACATGTATGT  
AGTGCACATACATGGCTGGTACCTGTGGAGGTCAGCAGAGGACATCCGATGCCCTGGGCTTGGGTGC  
TAGTGAGCCACCATGTGGACTGGAACAAACCCCAAGTCTGTTGGAAGAGCCCTCTCCAGCCCCA  
CGTGTATATTGAGCTAAAGAGAAAAGTTCGTGACTGTCTGCCTTAATCAGGGTCACTATTGGGGTGA  
AACCAACCATCATGGCTAAAGAACCTTGGGAAGAAAGGGGTTTGTTCAGCTTACACTTCCACATCA  
CTGTTGGTCAGCAAAGGAACTCAGGACAGGAACTCAAATAGGACAGGGACCTGGGGCAGCGGAGGG  
CGCTGCTTACTGGCTTACTCCCCATGGCTGTCTCAGCCTGCTTTCTTTCTTGAACCTTGTACCACCAG  
CCCATGGATGTCCACCCAGAATTGGCTGGGCTTTCCCCCATCGATTACTCTTTAAGAGTATGCCCTA  
TAGGGCTGCCTTCAGCTCCAGCTCTATTGTGTGGAGGCATTTCTCAATGGAGGGTCCCTCCTCCGTG  
ATGACTCTAGCTTGTGTCAGGTTGGTGTGGTAGCCAGCACATTATTTCTTGTGATTTTTGGTGAGTTA  
ACAAATGCTGACTGATTCCCTAGGAGTGTGCTCAATGTTTTCTAGGCTCTGGGGAGAGAGGACTGA  
ACAAGATGCTTCTGTTGGTGTTCACAAGGGTGCAGGTTCTTACGATTCTCTGCTCGCCACCTTTGAC  
ATACTGGGTTGTCGGCTGCCCTCATTCCCTGTGGTCTGACTTAATTAATA**ATAACTTCGTATAGCATAC**

ATTATACGAACGGTAAGTCACAGTGCTGGGCATAGCCAGACCCGCATGCAGGGAACATGGAAGCCATT  
TCTTCCTTCCTTAAAAAGAGGAAATAAAGGAGAAAATGTCAGCCCTCCTAGACATTGCCACATCATA  
GTTCCCTCCACTGGAGA ACTTACATGGAGAAAAGGAATTCCTGTGCTTGCCTTAACTGATACTCCGCC  
TCTGGAACGTGGCGGCGATGGTCTAAGGATTAAGTGCTCTGATTAACCTTCTCTCTTAAAGGAGCGGA  
GAGAGAGACACAGGACAGTGGTTCTGGGAACGATGATGGTGGCTTCAGTGAGGAGTGGGAGGCCCA  
AAGAGACAGTCACTGGGGCCTCATCGCTCCACTCCCGAGTCAAGAGCTGCTGTCCAGGA ACTTTCT  
GGGAGCATTCTAACGAGTGAAGACCCGGAGGAAA GTACGTGCATCACCTCTGCCTGACATCACGGCG  
GTGACATCACGGCGGTCTGTCAGTGGCAGGGTTATCTGTCTTTCAGAGGATGTTGAGTTTTTCTGGGG  
AAATAGCTTATTCAGGTGTTTGCCACACAAACATAAGAGGCTGAGTTTAACTCCAGCACTGTGTGTG  
TGTGTGTGTGTGTGTGTGTGTGTGTGTGTGTGTGTGTGTGTGTGTGTGTGTGTGTGTGTGTGTGTGTG  
GTGCATGGCCTCAGACACCTGTGCTCCCAGCACTGGGCAGGTATAGACAGGACGACCTCTGGGGCTT  
GCTGACCAGCCGCTCTAACTGAACCATTCAGTTCGGTGTGCTATGCCAGCTCCAAA ACTAAGCTAGA  
GAATGATTCAAGAAGACACCAGGCATCGACGTCGTACGTCGATGCCTGGTGTCTTCTTGAATCA  
TTCTCTAGCTTAGTTTTGGAGCTGGCATAGCACACGGAACTGGAATGGTTTCAGTTAGAGCGGCTGGTC  
AGCAAGCCCCAGAGGTCGTCCTGTCTATACCTGCCAGTGCTGGGAGCACAGGTGTCTGAGGCCATG  
CACGCACTCACACACACACACACACACACACACACACTCACACACACACACACACACACACACACAC  
ACACACACACACAGTGCTGGAGATTA AACTCAGCCTCTTATGTTTTGTGTGGCAAACACTGAATAAG  
CTATTTCCCCAGAAAACTCAACATCCTCTGAAAGACAGATAACCCTGCCACTGACAGACCCCGCTG  
ATGTCACCGCCGTGATGTCAGGCAGAGGTGATGCACGTACTTTCCTCCGGGTCTTCACTGTAGAAAT  
AGCCCCAGAAAGTTCCTGGACAGCAGCTCTTGACTCGGGAGTGGAGCGATGAGGCCCCAGGTGACTG  
TCTCTTTGGGCCTCCACTCCTCACTGAAGCCACCATCATCGTTCCAGAACCACTGTCTGTGTCTCT  
CTCTCCGCTCCTTTAAGAGAGAAGGTTAATCAGAGCACTTAATCCTTAGACCATCGCCGCCACGTTCC  
AGAGGGCGGAGTATCAGTTAAGGCAAGCACAGGAATTCCTTTTCTCCATGTAAGTTCCTCCAGTGGAG  
GAACTATGATGTGGCAATGTCTAGGAGGGCTGACATTTTCTCCTTTATTTCTCTTTTTTAAGGAAGGA  
AGAAATGGCTTCCATGTTCCCTGCATGCGGTCTGGCTATGCCAGCACTGTGACTATAACTTCGTATA  
ATGTATGCTATACGAACGGTACC GCGGAGGCATCGACGTTTGGCCTCTAGGCACCGTGGACACACAT  
AGCACACCCCTCGGTGCCCTTCTTTTTAATACATGTACACAAAAGAGAGAGAGTGTGGTGAATTTAAA  
ATGATAAGCAGATAATCTGAACAGCGCCAAAGCAGGAAGGTGGGCATTGAGATTCTAGGGTCACAC  
AGAATCTAAAGCAGAGAGAAGGTAAAGAAGGCAATCTTTCTGCGGCCTGAACTGTACACACCACTTA  
CTGACTTCTCTTTCAGTGCGGGACAAAGTGTACCGAGCTGCCAGGCAGGCCTCACACTCCTGGTCT  
TAAACTATCCTCCTCCTCAGACTTCTGAGTAGCTCAGAGTGCAGGCTCACACCACCTGCCAGCTTG  
GGATCATAGCTTTGAATTATGAAATCACAGAGTACTTGGG
